# Supplementary material
Source: PubMed Central journal article supplement (PMC3370055)
Supplement: NIHMS361907-supplement-Supp_Table_S1-S5___Fig_S1-S3.pdf [file NIHMS361907-supplement-Supp_Table_S1-S5___Fig_S1-S3.pdf]

Supp. Files S1-S4 can be found under Supporting Information as individual .bed files.

**Supp. File S1.** A .bed file that describes putative LCL associated loci in GENEVA SAGE, identified using CNVineta. This file may be viewed as a custom track in UCSC Genome Browser.

**Supp. File S2.** A .bed file that describes PBMC and LCL CNV calls. This file may be viewed as a custom track in UCSC Genome Browser.

**Supp. File S3.** A .bed file that describes DCL CNV calls. This file may be viewed as a custom track in UCSC Genome Browser.

**Supp. File S4.** A .bed file that describes HapMap Replicate CNV calls. This file may be viewed as a custom track in UCSC Genome Browser.

This file contains Supp. Figures S1-S3, and Supp. Tables S1-S5.

A. PBMC and LCL (n=205 comparisons)

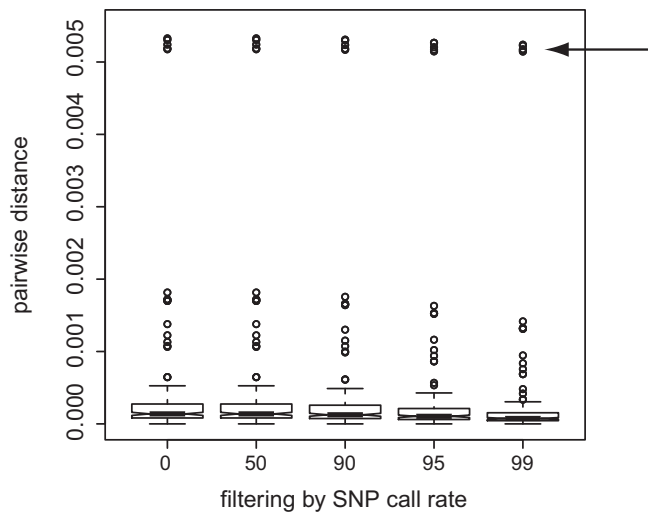

B. Differentiated cell types (n=81 comparisons)

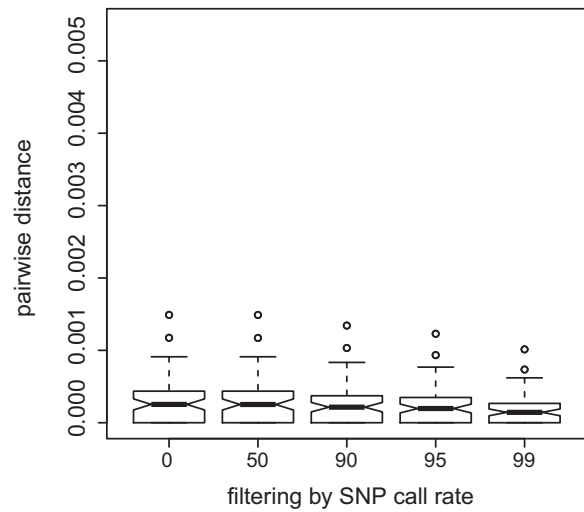

C. HapMap replicates (n=288 comparisons)

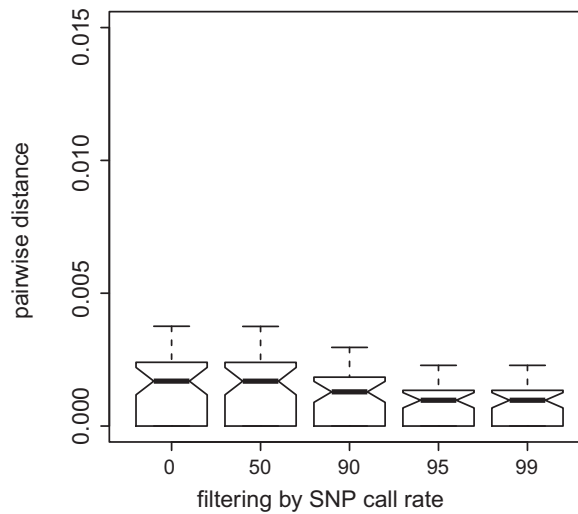

**Supp. Figure S1.** Boxplots of SNP concordance using PLINK software. Pairwise distances between genotypes from the same individual (y-axis) are plotted for unfiltered SNPs (left side) and SNPs for which there were <50%, <90%, <95%, and <99% NoCalls across all samples. (A) Data for PBMC/LCLs (n=205 comparisons). Note that outlier data points (arrow) reflect genotype discrepancies introduced by the comparison of samples B5 and L51 (described in Figures 2 and 3). (B) Data for differentiated cells (n=81 comparisons). Maximum values in the distribution ranged from 0.0008 (no filtering) to 0.0006 (99% filtering). (C) HapMap replicate samples from 6 individuals (n=334 comparisons).

## A. Lymphoblastoid cell line L14 (chromosome 6)

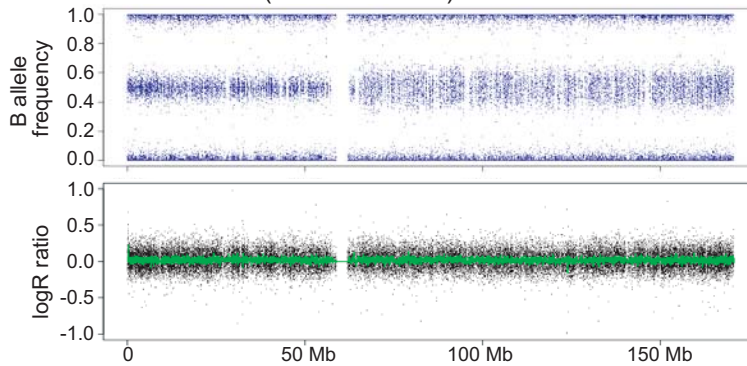

## B. Lymphoblastoid cell line L43 (chromosome 11)

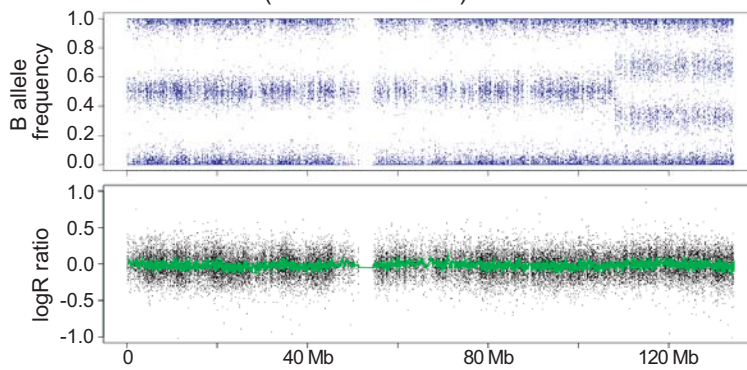

## C. Lymphoblastoid cell line L33 (chromosome X)

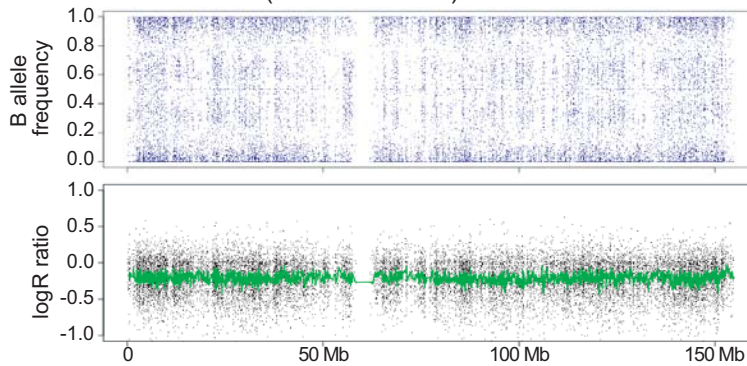

## D. Lymphoblastoid cell line L41 (chromosome X)

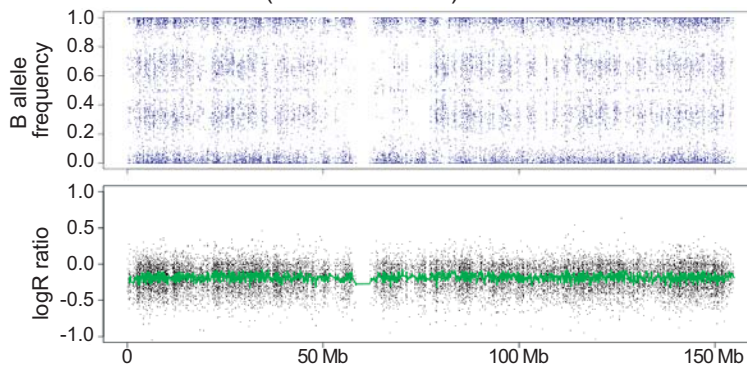

**Supp. Figure S2.** Mosaic abnormalities in multiple LCLs. Plots of B allele frequency and logR ratio are shown for samples (A) L14; 12% segmental mosaic UPD on chromosome 6, (B) L43; 38% segmental mosaic UPD on chromosome 11, (C) L33; mosaic loss of X chromosome and (D) L41; mosaic loss of X chromosome.

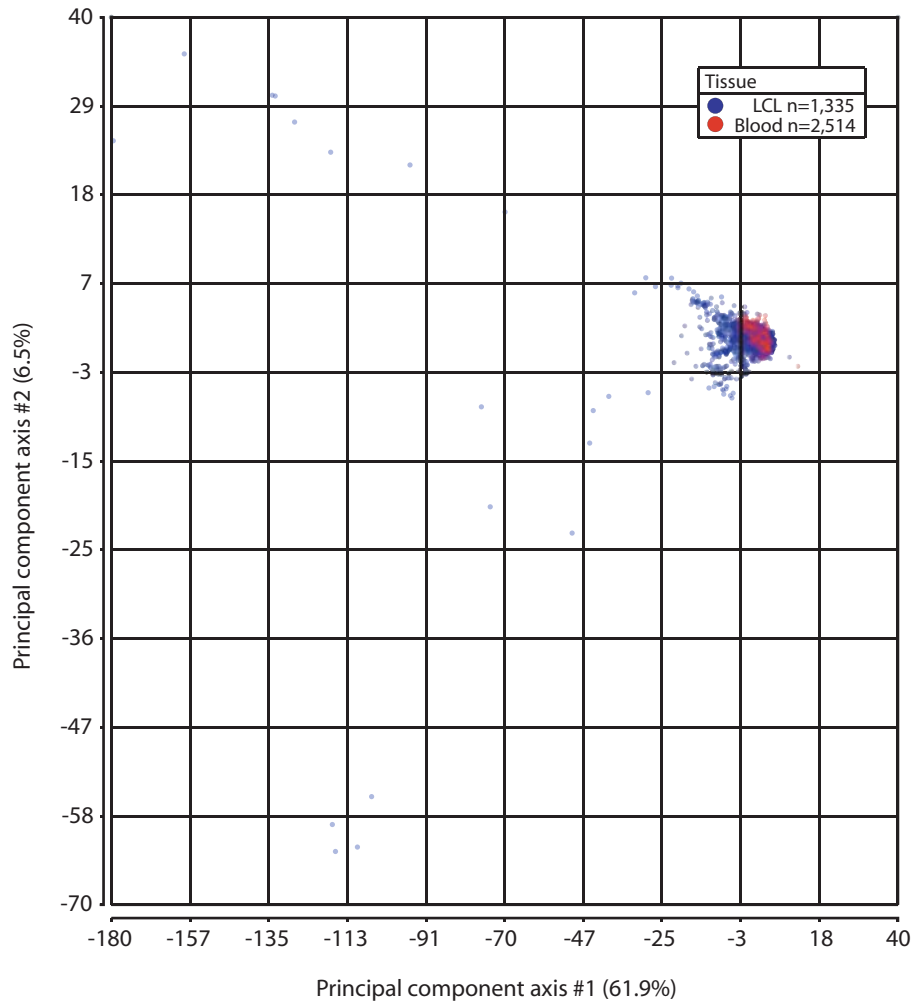

**Supp. Figure S3.** PCA of LogR intensity data for 106 SNPs ( $n=4032$  samples) in a chromosome 22 immunoglobulin locus (hg18 coordinates chr22:21,028,552-21,443,164). While blood-derived DNA samples were discretely localized on the PCA plot, indicating similarity among those samples, the LCL-derived samples displayed much greater heterogeneity. The first principal component (PC #1) accounted for 61.9% of the variance, while PC #2 accounted for 6.5% of the variance. Note that all the outlier data points along PCs #1 and #2 consisted of LCL samples.

**Supp. Table S1. Multiple samples from the same subject utilized in intra-subject comparisons**

| <b>Sample ID</b> | <b>Coriell ID</b> | <b>Cell Type</b> | <b>Gender</b> | <b>Age (Years)</b> | <b>Race</b>      |
|------------------|-------------------|------------------|---------------|--------------------|------------------|
| B1               | --                | PBMC             | Male          | 55                 | Caucasian        |
| L11              | GM22641           | LCL              | Male          | 55                 | Caucasian        |
| L12              | GM22642           | LCL              | Male          | 55                 | Caucasian        |
| L13              | GM22643           | LCL              | Male          | 55                 | Caucasian        |
| L14              | GM22644           | LCL              | Male          | 55                 | Caucasian        |
| L15              | GM22645           | LCL              | Male          | 55                 | Caucasian        |
| B2               | --                | PBMC             | Male          | 26                 | Caucasian        |
| L21              | GM22647           | LCL              | Male          | 26                 | Caucasian        |
| L22              | GM22648           | LCL              | Male          | 26                 | Caucasian        |
| L23              | GM22649           | LCL              | Male          | 26                 | Caucasian        |
| L24              | GM22650           | LCL              | Male          | 26                 | Caucasian        |
| L25              | GM22651           | LCL              | Male          | 26                 | Caucasian        |
| B3               | --                | PBMC             | Female        | 28                 | Caucasian        |
| L31              | GM22671           | LCL              | Female        | 28                 | Caucasian        |
| L32              | GM22672           | LCL              | Female        | 28                 | Caucasian        |
| L33              | GM22673           | LCL              | Female        | 28                 | Caucasian        |
| L34              | GM22674           | LCL              | Female        | 28                 | Caucasian        |
| L35              | GM22675           | LCL              | Female        | 28                 | Caucasian        |
| B4               | --                | PBMC             | Female        | 28                 | Caucasian        |
| L41              | GM22677           | LCL              | Female        | 64                 | Caucasian        |
| L42              | GM22678           | LCL              | Female        | 64                 | Caucasian        |
| L43              | GM22679           | LCL              | Female        | 64                 | Caucasian        |
| L44              | GM22680           | LCL              | Female        | 64                 | Caucasian        |
| L45              | GM22681           | LCL              | Female        | 64                 | Caucasian        |
| B5               | --                | PBMC             | Male          | 32                 | African-American |
| L51              | GM22731           | LCL              | Male          | 32                 | African-American |
| L52              | GM22732           | LCL              | Male          | 32                 | African-American |
| L53              | GM22733           | LCL              | Male          | 32                 | African-American |
| L54              | GM22734           | LCL              | Male          | 32                 | African-American |
| L55              | GM22735           | LCL              | Male          | 32                 | African-American |
| B6               | --                | PBMC             | Female        | 26                 | African-American |
| L61              | GM22737           | LCL              | Female        | 26                 | African-American |
| L62              | GM22738           | LCL              | Female        | 26                 | African-American |
| L63              | GM22739           | LCL              | Female        | 26                 | African-American |
| L64              | GM22741           | LCL              | Female        | 26                 | African-American |

Abbreviations: PBMC, peripheral blood mononuclear cells; LCL, Lymphoblastoid Cell Line

**Supp. Table S2. Multiple differentiated cell types from the same individual utilized in intra-subject comparisons**

| <b>Sample ID</b> | <b>Coriell ID</b> | <b>Cell Type</b> | <b>Gender</b> |
|------------------|-------------------|------------------|---------------|
| 1F               | GM22133           | Fibroblast       | male          |
| 1M               | GM22134           | Melanocyte       | male          |
| 1K               | GM22135           | Keratinocyte     | male          |
| 2M               | --                | Melanocyte*      | male          |
| 2K               | GM22185           | Keratinocyte     | male          |
| 2F               | GM22186           | Fibroblast       | male          |
| 3M               | GM22189           | Melanocyte       | male          |
| 3K               | --                | Keratinocyte**   | male          |
| 3F               | GM22191           | Fibroblast       | male          |
| 4M               | GM22250           | Melanocyte       | male          |
| 4K               | GM22251           | Keratinocyte     | male          |
| 4F               | GM22252           | Fibroblast       | male          |
| 5M               | GM22253           | Melanocyte       | male          |
| 5K               | GM22254           | Keratinocyte     | male          |
| 5F               | GM22255           | Fibroblast       | male          |
| 6M               | GM22258           | Melanocyte       | male          |
| 6K               | GM22259           | Keratinocyte     | male          |
| 6F               | GM22260           | Fibroblast       | male          |
| 7M               | GM22261           | Melanocyte       | male          |
| 7K               | GM22262           | Keratinocyte     | male          |
| 7F               | GM22263           | Fibroblast       | male          |
| 8M               | GM22266           | Melanocyte       | male          |
| 8K               | GM22267           | Keratinocyte     | male          |
| 8F               | GM22268           | Fibroblast       | male          |
| 9M               | GM22275           | Melanocyte       | male          |
| 9K               | GM22276           | Keratinocyte     | male          |
| 9F               | GM22277           | Fibroblast       | male          |

-- indicates cell lines that are not available from Coriell.

\* Culture only 30% melanocytes (remaining 70% likely fibroblasts)

\*\* Culture contained 62% keratinocytes (remaining 38% melanocytes)

**Supp. Table S3. Concordance of genotype between DCLs consisting of fibroblast (F), keratinocyte (K), and melanocyte (M) samples derived from same individual (n=9 individuals)**

| <b>ID1</b> | <b>ID2</b> | <b>IBS0</b> | <b>IBS1</b> | <b>IBS2</b> | <b>Concordance</b> |
|------------|------------|-------------|-------------|-------------|--------------------|
| 1F         | 1K         | 0           | 288         | 868142      | 99.97              |
| 1F         | 1M         | 0           | 534         | 866807      | 99.94              |
| 1K         | 1M         | 0           | 464         | 867289      | 99.95              |
| 2F         | 2K         | 0           | 724         | 867107      | 99.92              |
| 2F         | 2M         | 0           | 478         | 867332      | 99.94              |
| 2K         | 2M         | 0           | 1047        | 865926      | 99.88              |
| 3F         | 3K         | 0           | 439         | 866992      | 99.95              |
| 3F         | 3M         | 0           | 355         | 867434      | 99.96              |
| 3K         | 3M         | 0           | 526         | 866679      | 99.94              |
| 4F         | 4K         | 0           | 925         | 865560      | 99.89              |
| 4F         | 4M         | 0           | 665         | 865814      | 99.92              |
| 4K         | 4M         | 0           | 683         | 866670      | 99.92              |
| 5F         | 5K         | 0           | 1317        | 864372      | 99.85              |
| 5F         | 5M         | 0           | 762         | 865431      | 99.91              |
| 5K         | 5M         | 1           | 1496        | 862878      | 99.83              |
| 6F         | 6K         | 0           | 309         | 867247      | 99.96              |
| 6F         | 6M         | 0           | 756         | 865823      | 99.91              |
| 6K         | 6M         | 0           | 688         | 866028      | 99.92              |
| 7F         | 7K         | 0           | 1522        | 863870      | 99.82              |
| 7F         | 7M         | 0           | 1575        | 862561      | 99.82              |
| 7K         | 7M         | 0           | 728         | 865674      | 99.92              |
| 8F         | 8K         | 1           | 365         | 867759      | 99.96              |
| 8F         | 8M         | 0           | 393         | 867672      | 99.95              |
| 8K         | 8M         | 0           | 200         | 868258      | 99.98              |
| 9F         | 9K         | 0           | 1135        | 864617      | 99.87              |
| 9F         | 9M         | 0           | 2571        | 859794      | 99.70              |
| 9K         | 9M         | 0           | 2030        | 862348      | 99.77              |
|            |            |             |             | Mean        | 99.90              |

**Supp. Table S4. Concordance of genotype between HapMap replicates**

| <b>ID1</b>   | <b>ID2</b>   | <b>IBS0</b> | <b>IBS1</b> | <b>IBS2</b> | <b>Concordance</b> |
|--------------|--------------|-------------|-------------|-------------|--------------------|
| NA10851_rep1 | NA10851_rep2 | 87          | 2469        | 880903      | 99.71              |
| NA10851_rep1 | NA10851_rep3 | 95          | 3178        | 878618      | 99.63              |
| NA10851_rep2 | NA10851_rep3 | 90          | 3375        | 878025      | 99.61              |
| NA12239_rep1 | NA12239_rep2 | 3           | 6000        | 871691      | 99.32              |
| NA12239_rep1 | NA12239_rep3 | 0           | 6606        | 873272      | 99.25              |
| NA12239_rep2 | NA12239_rep3 | 2           | 4519        | 879352      | 99.49              |
| NA15510_rep1 | NA15510_rep2 | 1           | 2663        | 882424      | 99.70              |
| NA15510_rep1 | NA15510_rep3 | 3           | 3797        | 882406      | 99.57              |
| NA15510_rep2 | NA15510_rep3 | 1           | 2574        | 886880      | 99.71              |
| NA18517_rep1 | NA18517_rep2 | 0           | 5492        | 869112      | 99.37              |
| NA18517_rep1 | NA18517_rep3 | 1           | 5664        | 872654      | 99.36              |
| NA18517_rep2 | NA18517_rep3 | 0           | 2808        | 881534      | 99.68              |
| NA18576_rep1 | NA18576_rep2 | 2           | 4205        | 876359      | 99.52              |
| NA18576_rep1 | NA18576_rep3 | 1           | 2993        | 883551      | 99.66              |
| NA18576_rep2 | NA18576_rep3 | 1           | 5139        | 878427      | 99.42              |
| NA18980_rep1 | NA18980_rep2 | 1           | 4052        | 874831      | 99.54              |
| NA18980_rep1 | NA18980_rep3 | 1           | 3982        | 876386      | 99.55              |
| NA18980_rep2 | NA18980_rep3 | 0           | 4022        | 877319      | 99.54              |
|              |              |             |             | Mean        | 99.54              |



**Supp. Table S5. Common CNV regions in DCLs (variant in > 50% of samples & size > 25 kb)**

| Index | Chr | Region start | Region end | Size (bp) | Number of genes | Ig overlap | # CNV | # CNV DGV | #CNV GS/B n=2514 | #CNV GS/LCL n=1335 | p-value |
|-------|-----|--------------|------------|-----------|-----------------|------------|-------|-----------|------------------|--------------------|---------|
| 1     | 1   | 72541006     | 72584492   | 43486     | 0               |            | 24    | 32        | 0                | 0                  | NA      |
| 2     | 1   | 194994473    | 195083353  | 88880     | 4               |            | 13    | 54        | 105              | 56                 | 0.047   |
| 3     | 2   | 88914239     | 89282353   | 368114    | 5               | 13 IgK     | 26    | 114       | 0                | 0                  | NA      |
| 4     | 3   | 163995351    | 164109297  | 113946    | 1               |            | 21    | 39        | 0                | 5                  | 0.013   |
| 5     | 4   | 34455255     | 34506399   | 51144     | 0               |            | 18    | 27        | 6                | 10                 | 0.13    |
| 6     | 6   | 103841338    | 103868754  | 27416     | 0               |            | 13    | 29        | 0                | 1                  | 0.42    |
| 7     | 8   | 39349340     | 39506122   | 156782    | 13              |            | 15    | 38        | 8                | 8                  | 0.61    |
| 8     | 9   | 44173590     | 46324418   | 2150828   | 12              |            | 17    | 192       | 25               | 16                 | 0.75    |
| 9     | 11  | 55130608     | 55210152   | 79544     | 4               |            | 15    | 75        | 705              | 395                | 2.6e-9  |
| 10    | 12  | 9525137      | 9626237    | 101100    | 1               |            | 15    | 25        | 0                | 0                  | NA      |
| 11    | 14  | 105413362    | 105892781  | 479419    | 10              |            | 23    | 183       | 1                | 9                  | 0.0026  |
| 12    | 15  | 32466069     | 32645302   | 179233    | 9               |            | 13    | 106       | 107              | 113                | 0.0050  |
| 13    | 15  | 18463975     | 20232614   | 1768639   | 34              |            | 25    | 306       | 250              | 200                | 0.31    |
| 14    | 17  | 41521621     | 42120174   | 598553    | 20              |            | 15    | 110       | 175              | 132                | 0.80    |
| 15    | 20  | 1505190      | 1541893    | 36703     | 3               |            | 17    | 43        | 0                | 0                  | NA      |
| 16    | 22  | 22674422     | 22726814   | 52392     | 10              |            | 15    | 47        | 110              | 75                 | 0.64    |

Abbreviations: Chr, chromosome; Number of genes refers to UCSC Genes track (hg18) from the UCSC Genome Browser; Ig overlap, number of immunoglobulin elements in the region based on BioMart at Ensembl (build GRCh37.p3); IgK, immunoglobulin kappa; TCR, T-cell receptor; IgH, immunoglobulin heavy chain; # CNV, number of copy number variants observed in this study; # CNV DGV, number of copy number variants present in the Database of Genomic Variants; #CNV GS/B, number of autosomal copy number variants in GENEVA SAGE samples derived from blood; #CNV GS/LCL, number of autosomal copy number variants in GENEVA SAGE samples derived from LCL; p-value, result of two-sided Fisher's Exact test on GENEVA SAGE samples (case=LCL derived samples, control=blood derived samples).
